# Supplementary material
Source: PubMed Central journal article supplement (PMC5645036)

Figure S1

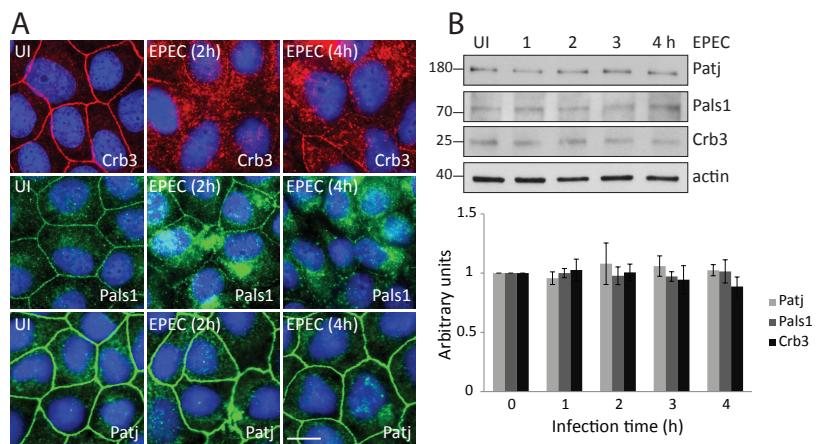

Figure S2

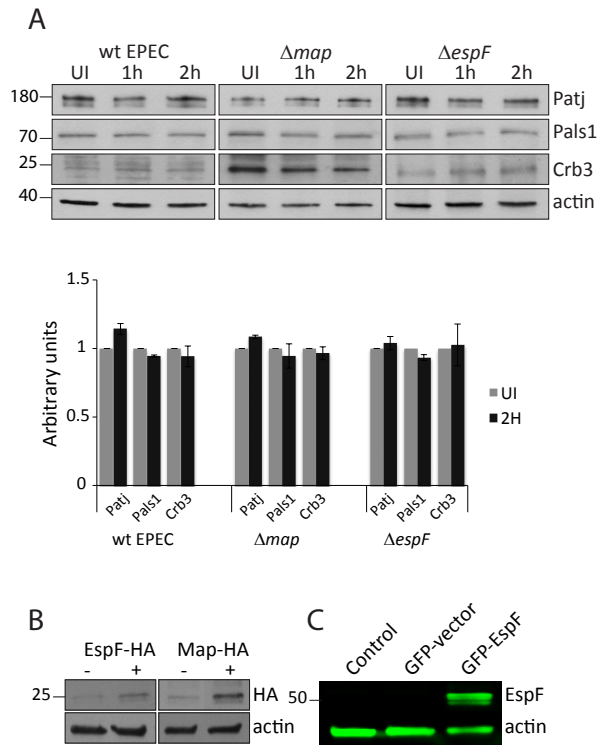

Figure S3

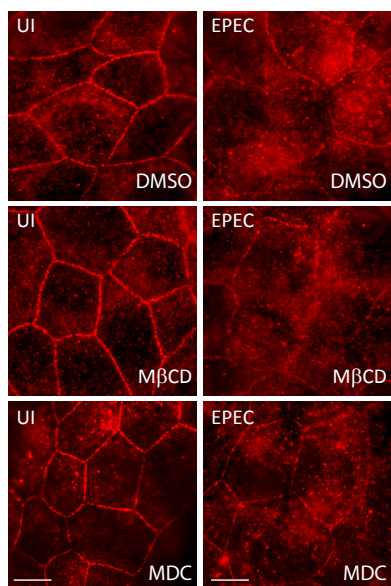

Figure S4

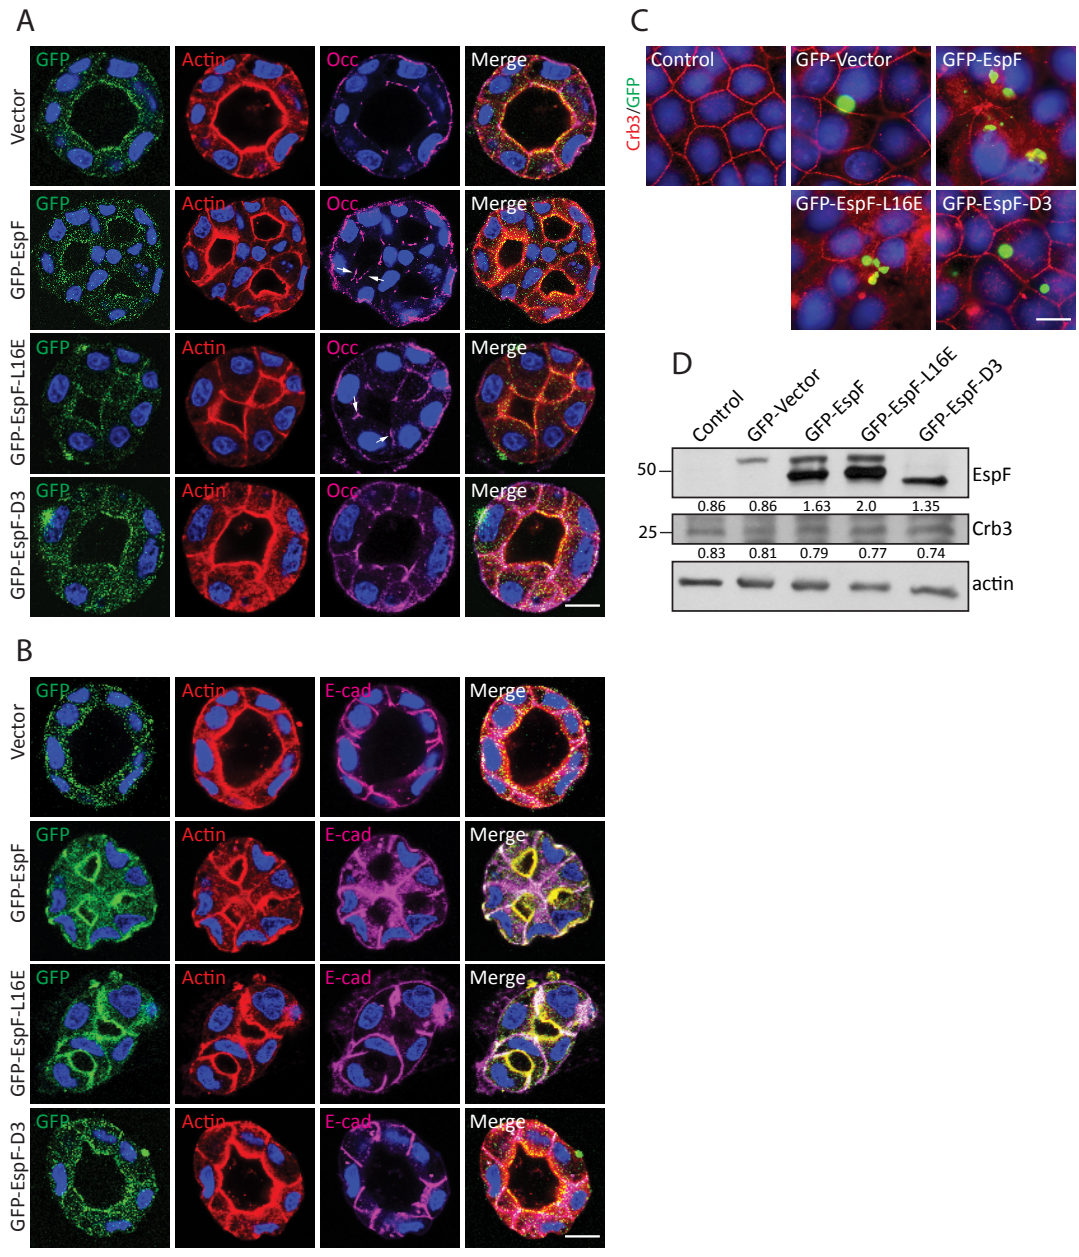

Figure S5

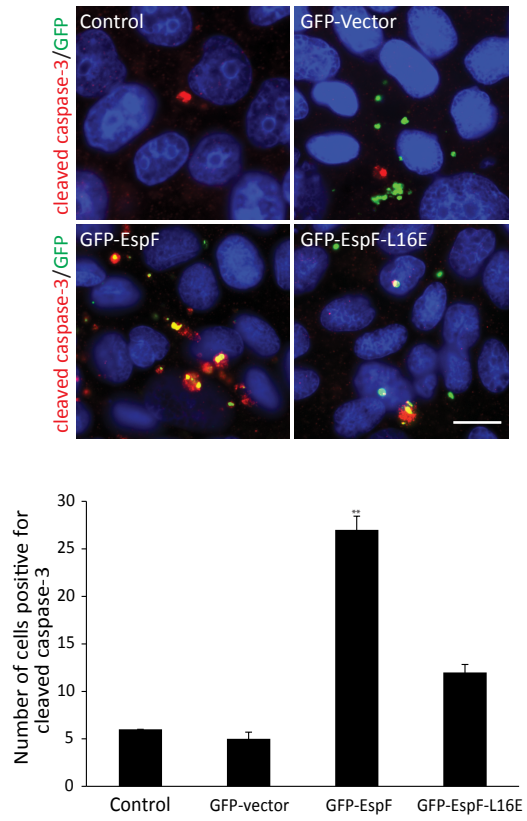

Supplement: NIHMS884733-supplement-supplement_1.pdf [file NIHMS884733-supplement-supplement_1.pdf]
